# Supplementary material
Source: PubMed Central journal article supplement (PMC2714925)
Supplement: tpc.108.062968_1.pdf [file tpc.108.062968_1.pdf]

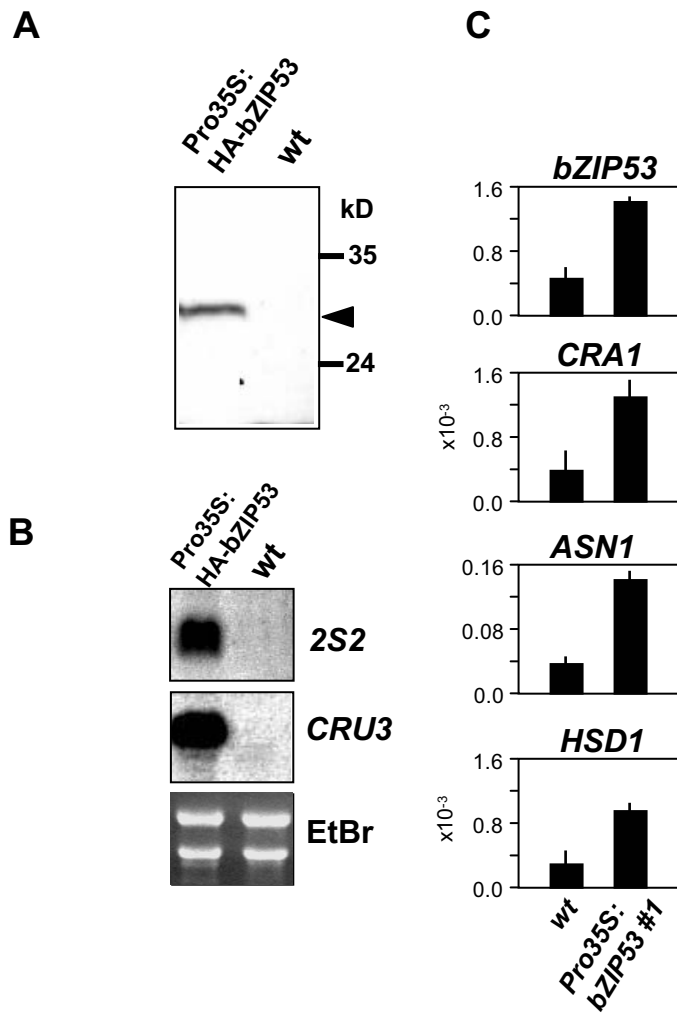

**Supplemental Figure 1.** Analysis of putative bZIP53 target genes in plants constitutively expressing HA-bZIP53 (**A**, **B**) or bZIP53 (**C**). (**A**) Immunoblot analysis of Pro35S:HA-bZIP53 plants using a HA-tag-specific antiserum ( $\alpha$ -HA) (arrow). Mass of marker proteins is provided in kilo Dalton (kD). (**B**) Transcription of *2S2* and *CRU3* in leaves of wild-type (wt) and Pro35S:HA-bZIP53 plants has been studied by RNA gel blot analysis. Equal loading was confirmed by Ethidium bromide (EtBr) staining. (**C**) RT-qPCR analysis of two week-old wild-type (wt) and Pro35S:bZIP53 plants (line #1) for expression of *bZIP53*, *CRA1* (Wang et al., 2007), *HSD1* (Li et al., 2007) and *ASN1* (Lam et al., 2003). Expression levels are given as relative to a *UBIQUITIN (UBI10)* gene for normalization. Average values and standard errors from four replicates and two different experiments are shown.

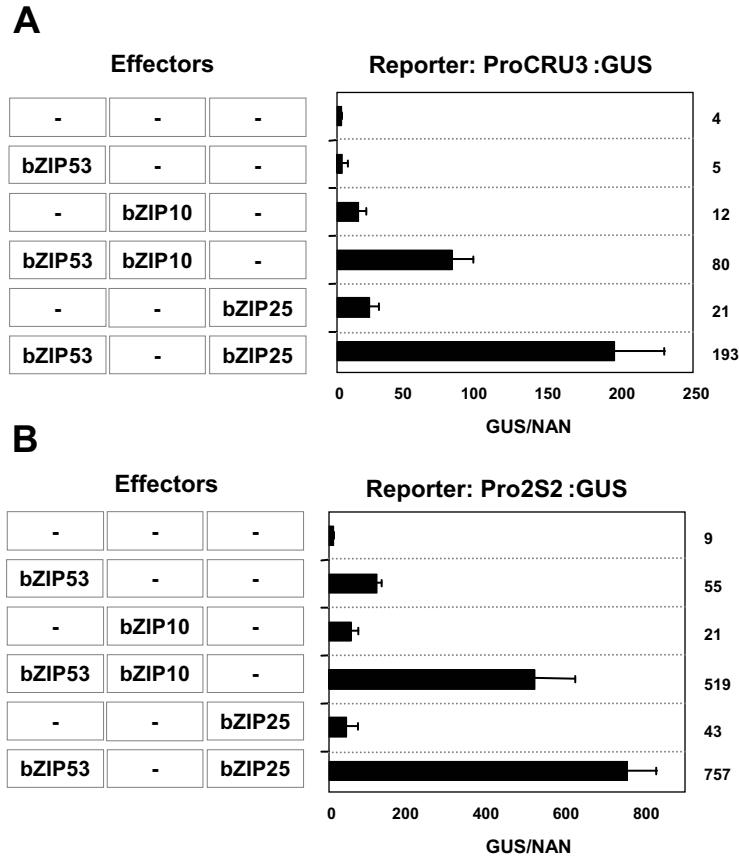

**Supplemental Figure 2.** Transient expression of bZIP53 in combination with bZIP10 or bZIP25 synergistically enhances transactivation of *CRU3* and *2S2* promoters. Arabidopsis protoplasts were transfected with constructs containing ProCRU3:GUS (A) or Pro2S2:GUS (B) reporters. Effector constructs containing specific *bZIP* genes under the control of a Pro35S were used in cotransfection experiments. 3  $\mu$ g of a control plasmid containing a Pro35S:NAN cassette was included in all experiments to normalize GUS expression values for differences in transfection efficiencies as described by Ehlert et al. (2006). X-axis values are expressed as GUS activity relative to NAN activity. Numbers along the Y-axis represent fold-induction values relative to non-transfected control cells. Given are mean values of 4 independent transfections. All experiments were repeated at least 3 times with similar results.

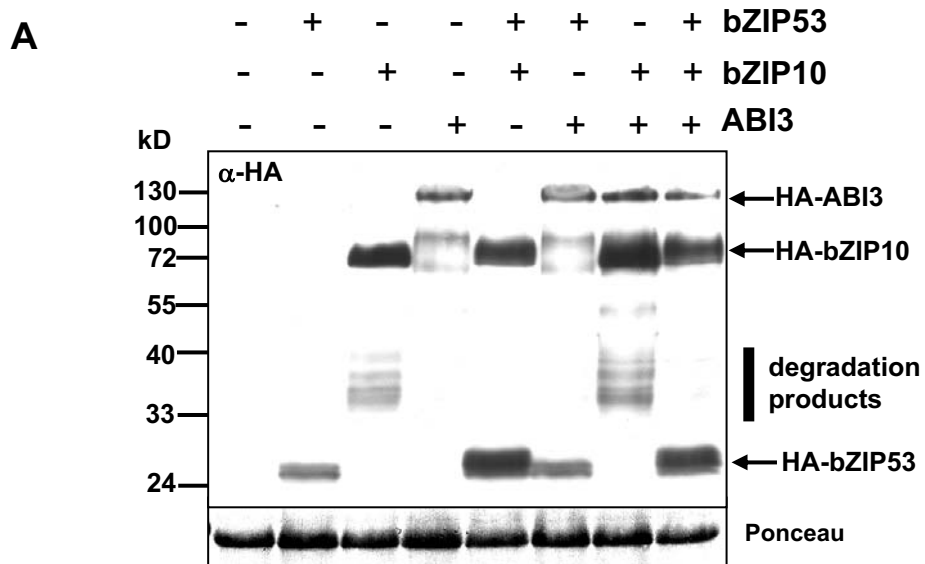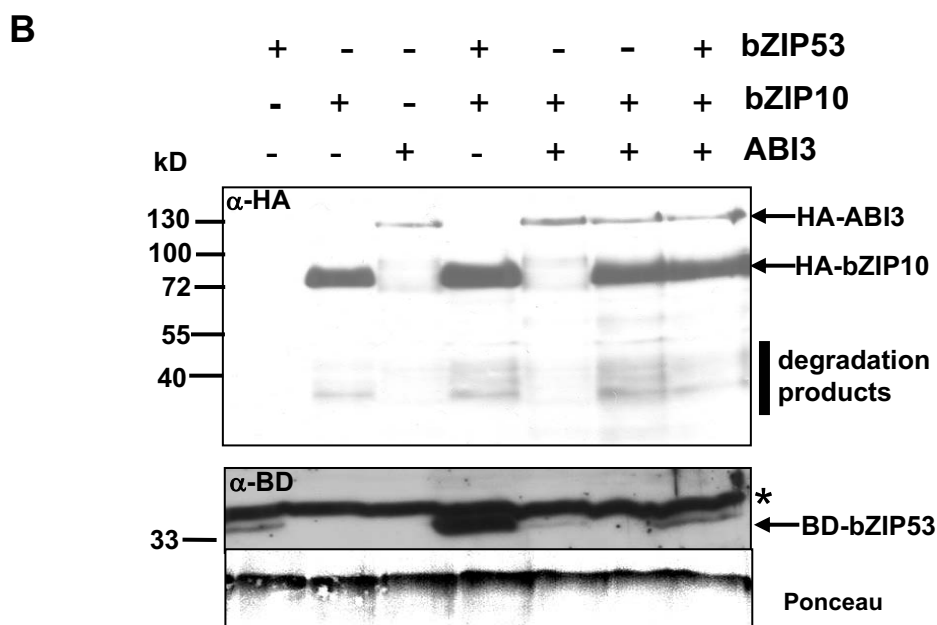

**Supplemental Figure 3.** Analysis of effector proteins transiently expressed in Arabidopsis protoplasts. Expression of the HA- and Gal4 DNA binding domain-(BD)-tagged bZIP effectors used in the experiments in Supplemental Figure 2 and Figure 6 (A) or Figure 4D (B), respectively. Proteins are detected in immunoblot experiments making use of  $\alpha$ -HA or  $\alpha$ -BD antisera. Protoplasts have been transiently transformed with the constructs indicated. Degradation products and tagged bZIP proteins are marked by a black line or arrows, respectively. Unspecific background staining is indicated by \*. Marker proteins are labelled according to their size in kilo Dalton (kD). Equal loading was confirmed by Ponceau staining.

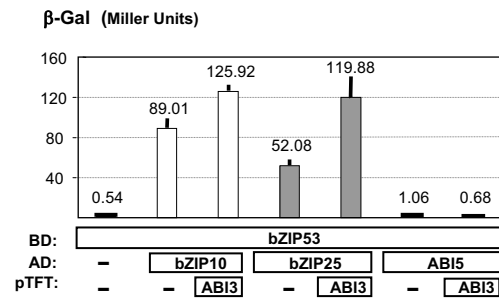

**Supplemental Figure 4.** Ternary protein interaction studied in a yeast three-hybrid system. Yeast strains (SFY526) expressing different combinations of BD-bZIP53, AD-ABI3 and bZIP10 or bZIP25 were assayed for  $\beta$ -galactosidase activity. The latter were provided in the three-hybrid vector pTFT (Egea-Cortines et al., 1999). Average values (Miller units, M.U.) and standard errors from six replicates and two independent experiments are shown.

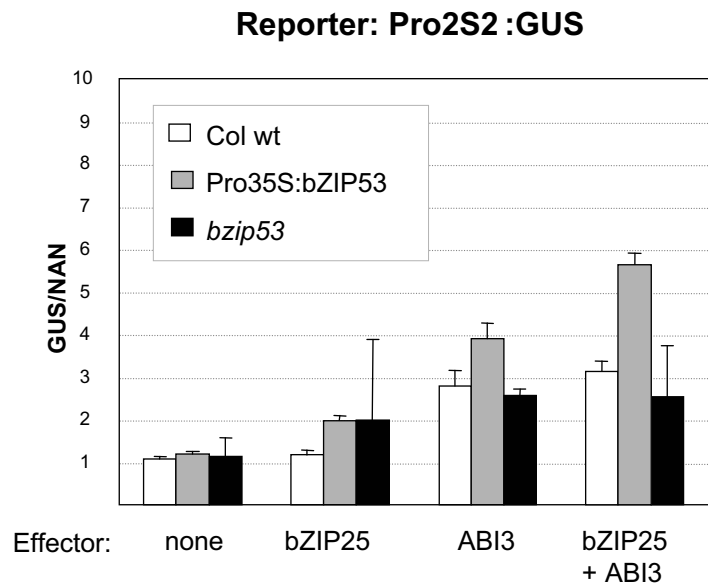

**Supplemental Figure 5.** Transient expression by microparticle bombardment of Arabidopsis leaves from Columbia wild type (Col wt; white bars) and plants with increased (Pro35S:bZIP53; grey bars) or decreased (*bzip53*; black bars) expression of *bZIP53*. Effector constructs containing bZIP25 or ABI3 under the control of a 35S promoter (Pro35S) and a *GUS* reporter gene under the control of an 2S2 promoter were used. X-axis values are expressed as GUS activity relative to NAN activity (Kirby and Kavanagh, 2002). Average values and standard errors from four replicates are shown.

**Supplemental Table 1:** Oligonucleotide primers used in this study.

***UBI:***

5'- GCTCTTATCAAAGGACCTTCGG-3'  
5'- CGAACTTGAGGAGGTTGCAAAG-3'

***bZIP53***

5'-TAATGATCCGAGGTACGCCAC-3'  
5'-TGCTTCTGTTTCCTCATCCTTG-3'

***CRU3:***

5'-TAGATGTTCTCCAAGCCACCG-3'  
5'-AACGGAAACACCAACACATCG-3'

***2S2:***

5'-ATTTGCAAGATCCAGCAAGTTG-3'  
5'-AATACATTTAGCCTCAAACATC-3'

***LEA76:***

5'-ACAAAGAGCATTATCCAGGAAGT-3'  
5'-ACACAAAGATACTTTCATATCGT-3'

***ProDH:***

5'-GCATCAAACGGTTCTGGTTTC-3'  
5'-TGTTTATCGATCCCGAGGTCA-3'

***ASN1:***

5'-TTCAACGCCTTATGAGCCTCTT-3'  
5'-CACCAGAGAGCAAACTCCAAA-3'

***CRA1:***

5'-AGCCCAAATCCAGATCGTAAAC-3'  
5'-TCACCACCGAGAAACCTTGTG-3'

***HSD1:***

5'-TGCCGGAAACAAAGATACGTG-3'  
5'-AGTAACCGACAACCCCACTCA-3'
